# Supplementary material for: 3D cellular self-assembly on optical disc-imprinted nanopatterns
Source: Royal Society of Chemistry journal article supplement (doi:10.1039/d4lc00386a), 2024-01-01
Supplement: d4lc00386a1.pdf [file d4lc00386a1.pdf]

# Supplementary Information

## 3D cellular self-assembly on optical discs-imprinted nanopatterns

Jeeyeon Lee<sup>1</sup>, Chwee Teck Lim<sup>1,2,3\*</sup>

<sup>1</sup> Institute for Health Innovation and Technology (iHealthtech), National University of Singapore, Singapore 117599, Singapore

<sup>2</sup> Department of Biomedical Engineering, National University of Singapore, Singapore 117583, Singapore

<sup>3</sup> Mechanobiology Institute, National University of Singapore, Singapore 117411, Singapore

\*Corresponding author

E-mail: [ctlim@nus.edu.sg](mailto:ctlim@nus.edu.sg)

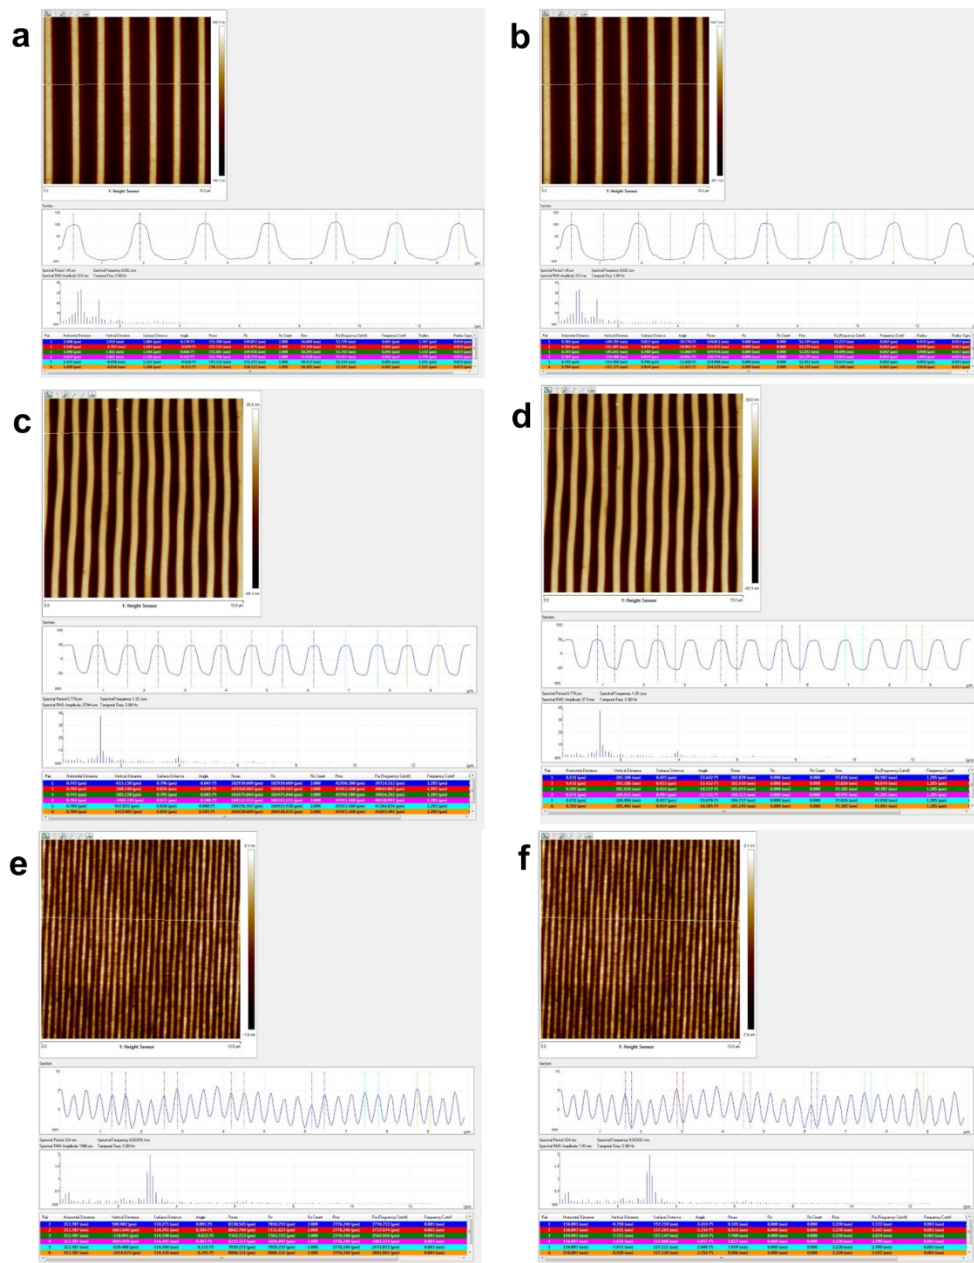

**Fig. S1** AFM analysis of writable optical discs. (a) groove spacings and (b) ridge heights of CD-R, (c) groove spacings and (d) ridge heights of DVD-R, (e) groove spacings and (f) ridge heights of BD-R.

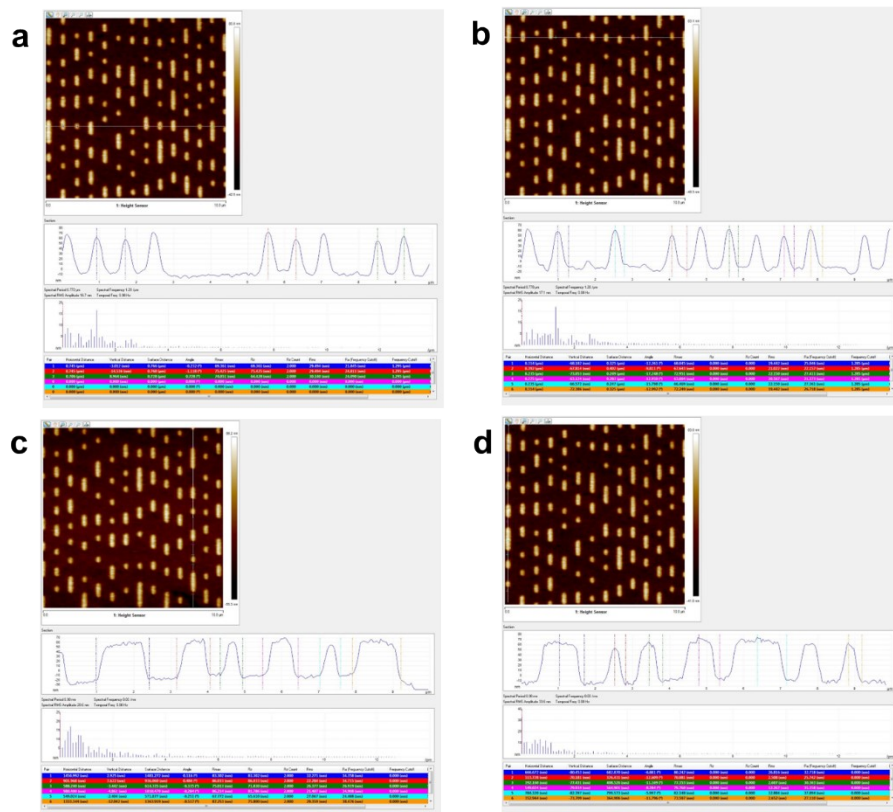

**Fig. S2** AFM analysis of DVD-M. The horizontal section exhibits (a) spacings between nanoposts and (b) their heights. The vertical section displays (c) the width and (d) the height of nanoposts.

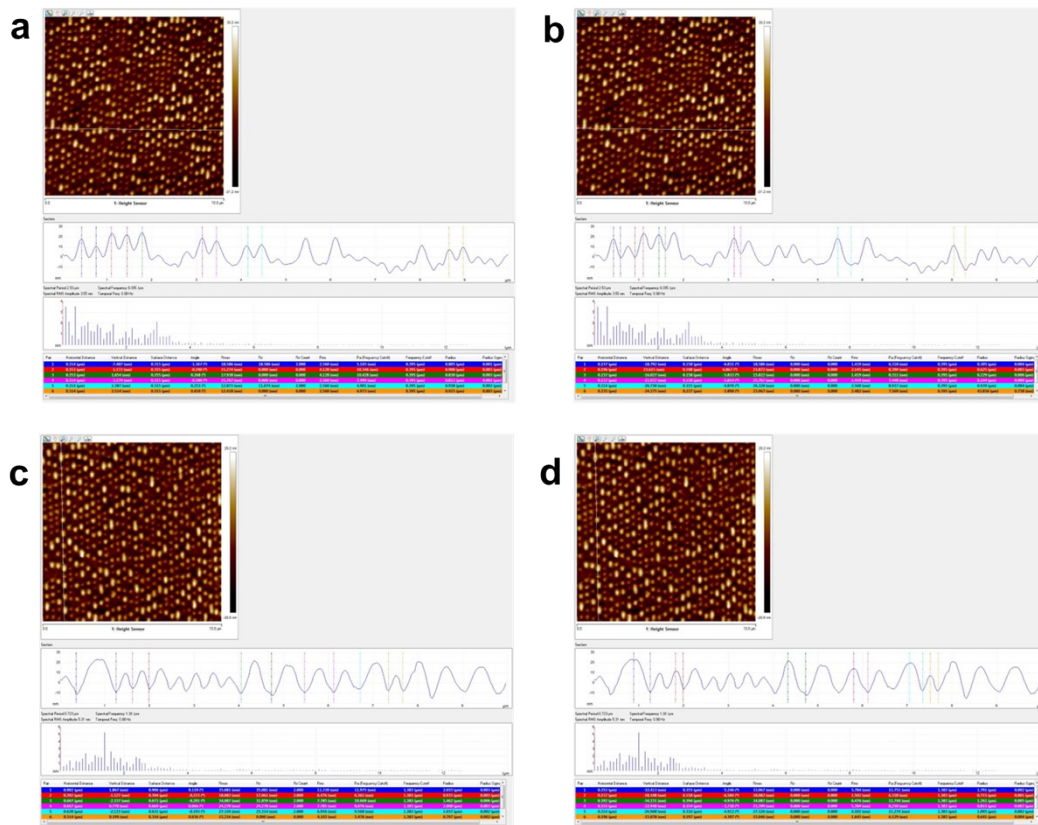

**Fig. S3** AFM analysis of BD-M. The horizontal section exhibits (a) spacings between nanoposts and (b) their heights. The vertical section displays (c) the width and (d) the height of nanoposts.

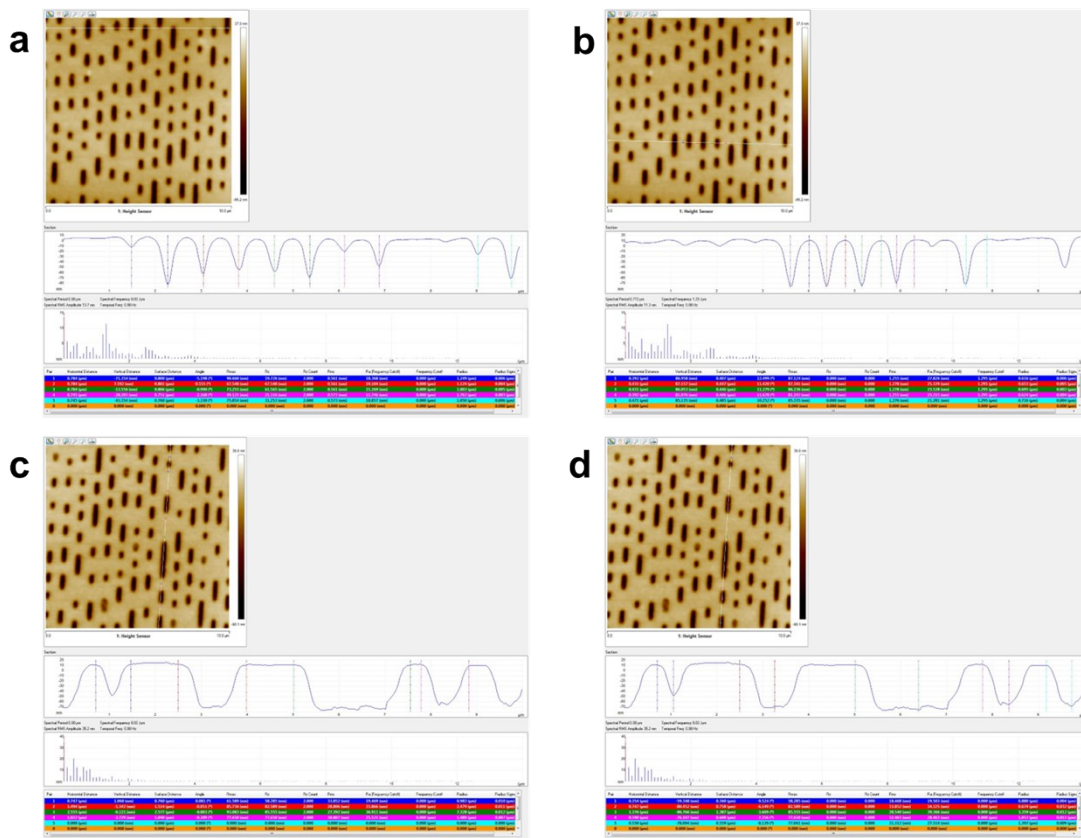

**Fig. S4** AFM analysis of Rev-DVD-M. The horizontal section exhibits (a) spacings between nanopits and (b) their depths. The vertical section displays (c) the width and (d) the depth of nanopits.

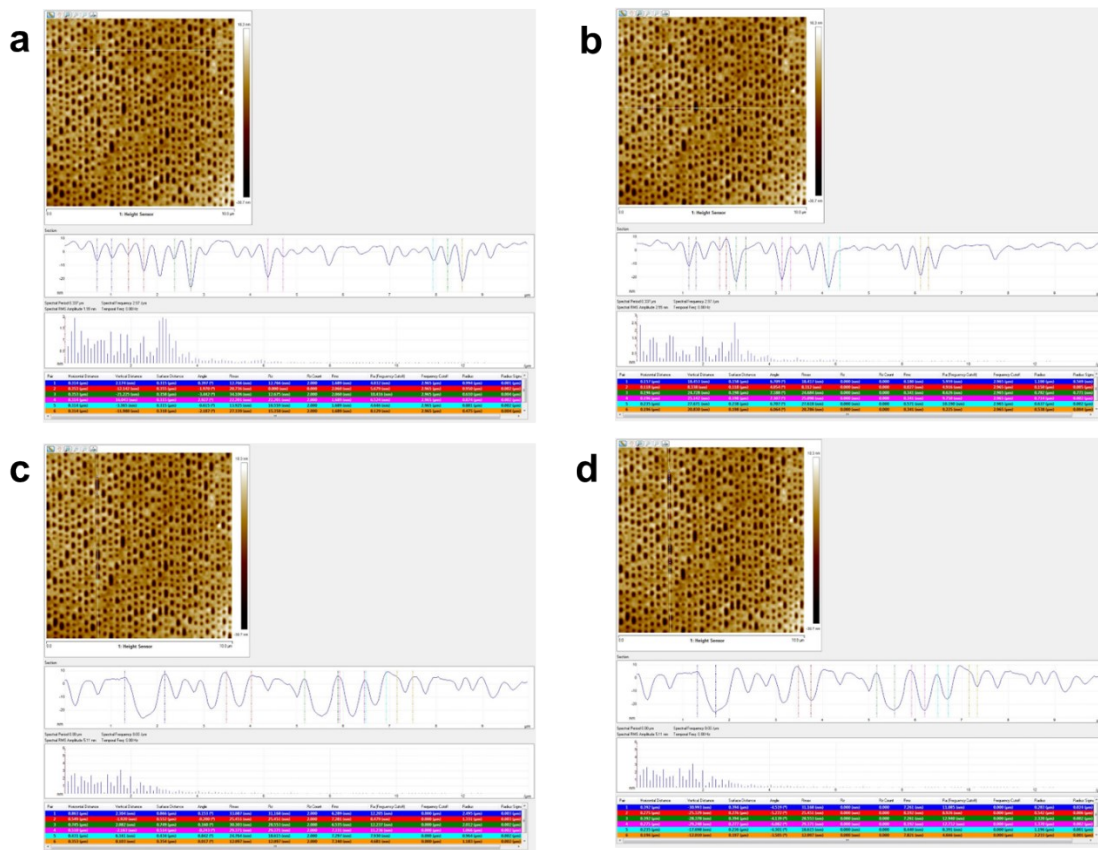

**Fig. S5** AFM analysis of Rev-BD-M. The horizontal section exhibits (a) spacings between nanodots and (b) their depths. The vertical section displays (c) the width and (d) the depth of nanodots.
